# Supplementary material
Source: PubMed Central journal article supplement (PMC4019057)
Supplement: MCB.00247-14_zmb999100428so1.pdf [file MCB.00247-14_zmb999100428so1.pdf]

## Supporting Information

**Figure S1 Western blots of endogenous and forcibly expressed PGC-1 $\alpha$  and PGC-1 $\beta$ .** Western blots were performed using cell lysates prepared from 293T cells infected with Ad-PGC-1 $\alpha$  (A, lane 1) or Ad-PGC-1 $\beta$  (B, lane 1) or Ter119<sup>+</sup> cells from a six week old wild type mouse (A and B, lanes 2).  $\beta$ -actin was visualized as a loading control.

**Figure S2 Compound mutant neonatal pup compared with wild type littermates.** PGC-1 neonatal compound mutant (*Pgc-1<sup>c</sup>*) exhibits growth retarded in comparison to wild type (WT) littermates.

**Figure S3. Differentiation profiles of hematopoietic lineage cells in the bone marrow, spleen, and liver of WT and mutant p0 pups.** Cells were examined for accumulation and maturation of B lymphocytes (by sorting for B220 and CD19 markers; panel A) and T lymphocytes (by examining accumulation of CD4 and CD8 markers; panel B). The numbers in each quadrant represent the fractional percentages of cells in that quadrant.

**Figure S4 Reticulocytes in wild type and *Pgc-1* mutant newborns.** The relative abundance of reticulocytes was measured by flow cytometry after thiazole orange staining of the whole blood from wild type (WT), or *Pgc-1* single or compound mutant neonatal pups. The number (mean  $\pm$  S.D. of at least 3 pups of each genotype) shown above the horizontal bar in each box represents the fractional percentage of reticulocytes in total red blood cells of each sample.

**Figure S5. ChIP assays depicting PGC-1 $\alpha$  and PGC-1 $\beta$  binding in the  $\beta$ -globin locus of *Pgc-1* compound mutant mice.** The binding of PGC-1 $\alpha$  and PGC-1 $\beta$  to select murine  $\beta$ -like globin gene promoters (as well as to an irrelevant control sequence located 5.9 kbp 5' to the  $\beta^{\text{maj}}$  promoter) in e11.5 circulating blood cells (left panel) or e14.5 fetal liver cells (right panel) from compound mutant (*Pgc-1<sup>c</sup>*) was analyzed in ChIP experiments. As anticipated, there was no significant enrichment of either co-activator at the promoters in comparison to the control IgG values. Error bars represent standard errors.

**Table S1 Primers used for genotyping and quantitative RT-PCR**
