# Supplementary material
Source: PubMed Central journal article supplement (PMC4019057)
Supplement: MCB.00247-14_zmb999100428so7.pdf [file MCB.00247-14_zmb999100428so7.pdf]

Supplemental Table 1. Primers used for genotyping and quantitative real-time PCR

| method and target               | Sequence (5' -> 3')      |                              |
|---------------------------------|--------------------------|------------------------------|
|                                 | forward                  | reverse                      |
| <b>genotyping</b>               |                          |                              |
| PGC-1 $\alpha$ <sup>+/+</sup>   | GTCTAAGATGTCTGCTCTTGAGG  | CCAGTTTCTTCATTGGTGTG         |
| PGC-1 $\alpha$ <sup>-/-</sup>   | TCCAGTAGGCAGAGATTTATGAC  | CCAAGTGTCTATAATTCCAGTTC      |
| PGC-1 $\beta$ <sup>+/+</sup>    | TCTGAGCCTTCGGTTCTACTTACA | ATCAATCAATCAATCAATCAATCAATCA |
| PGC-1 $\beta$ <sup>-/-</sup>    | TCTGAGCCTTCGGTTCTACTTACA | TGATAGACCCTGGGTCTGCCA        |
| <b>real-time PCR</b>            |                          |                              |
| GPA                             | GCCGAATGACAAAGAAAAGTTCA  | TCAATAGAACTCAAAGGCACACTGT    |
| $\epsilon$ y-globin             | ACCCTCATCAATGGCCTGTGGA   | CATGGGCTTTGACCCTTGGG         |
| $\beta$ h1-globin               | ATCATGGGAAACCCCGGA       | GGGTGAATTCCTTGGCAAAATGAGT    |
| $\beta$ <sup>maj</sup> -globin  | TCTGCTATCATGGGTAATGCCAAA | GAAGGCAGCCTGTGCAGCG          |
| $\zeta$ -globin                 | GGAGAAGATGGCTGCTCAGGC    | TGTGAGCAGCAGACAGTGGGA        |
| $\alpha$ -globin                | CCCGGTGCCTTGTCTGCT       | GTGAAATCGGCAGGGTGG           |
| PGC-1 $\alpha$                  | AGCCGTGACCACTGACAACGAG   | GCTGCATGGTTCTGAGTGCTAAG      |
| PGC-1 $\beta$                   | CTTGACTACTGTCTGTGAGGC    | CGCTCCAGGAGACTGAATCCAGAG     |
| 18S                             | ACCGCAGCTAGGAATAATGGA    | GCCTCAGTTCCGAAAACCA          |
| <b>ChIP assay</b>               |                          |                              |
| $\epsilon$ y promoter           | CCAGACTTGCCATCATGGTGA    | TCACCACCAACCTCTTCAACAT       |
| $\beta$ h1 promoter             | GGACAGGTCTTCAGCCTCTTGA   | CAGATGCTTGTGATAGCTGCCT       |
| $\beta$ <sup>maj</sup> promoter | CACCGAAGCCTGATTCCGTAGA   | GAAGCAAATGTGAGGAGCAACTGA     |
| $\beta$ <sup>maj</sup> 5.9k     | CGGGATGGGCATTAAGGTA      | AACAACCTGTGTCAGAAGCAGATG     |
