# Supplementary material
Source: PubMed Central journal article supplement (PMC4019057)

Supplemental Figure 1

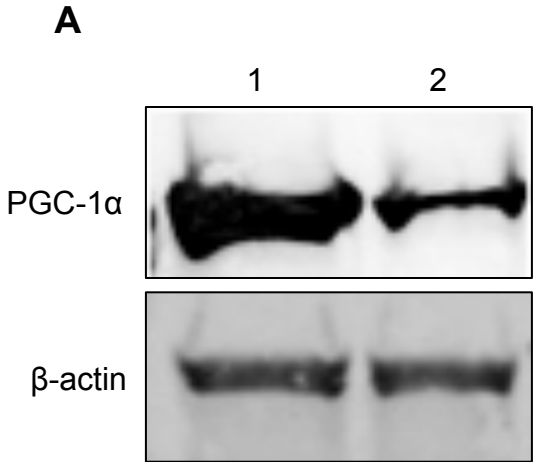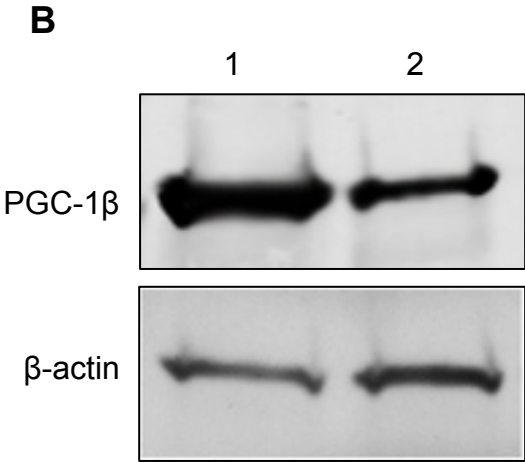

Supplement: MCB.00247-14_zmb999100428so2.pdf [file MCB.00247-14_zmb999100428so2.pdf]

Supplemental Figure 2

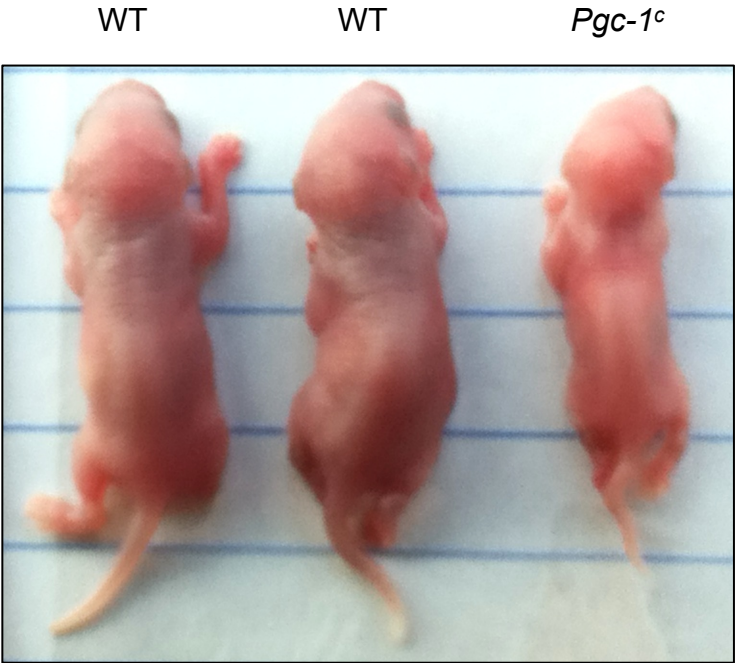

Supplement: MCB.00247-14_zmb999100428so3.pdf [file MCB.00247-14_zmb999100428so3.pdf]

# Supplemental Figure 3

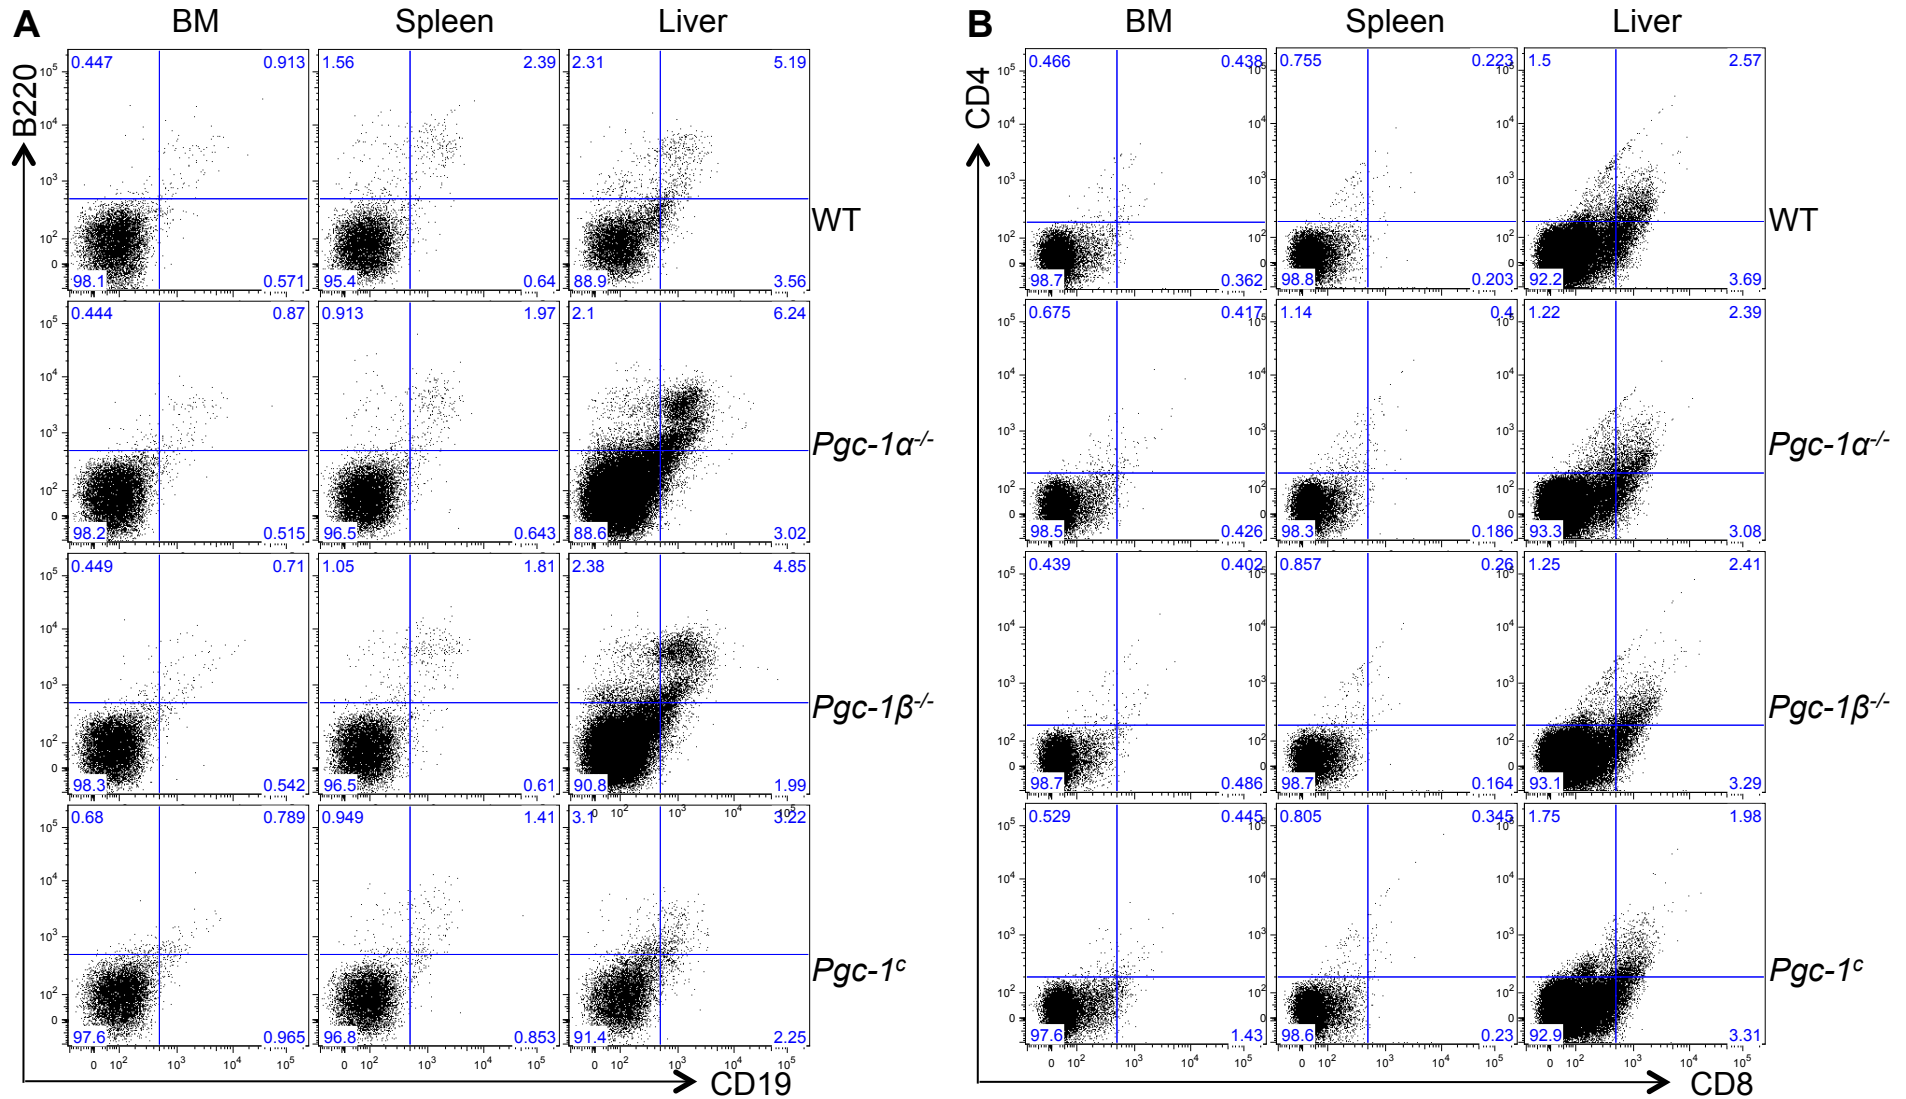

Supplement: MCB.00247-14_zmb999100428so4.pdf [file MCB.00247-14_zmb999100428so4.pdf]

Supplemental Figure 4

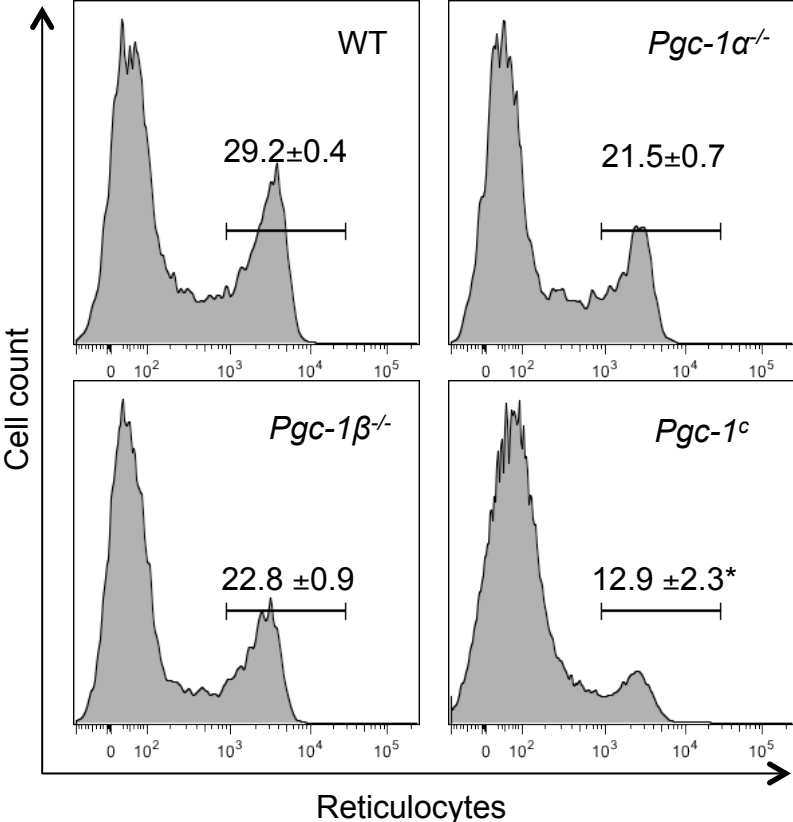

Supplement: MCB.00247-14_zmb999100428so5.pdf [file MCB.00247-14_zmb999100428so5.pdf]

Supplemental Figure 5

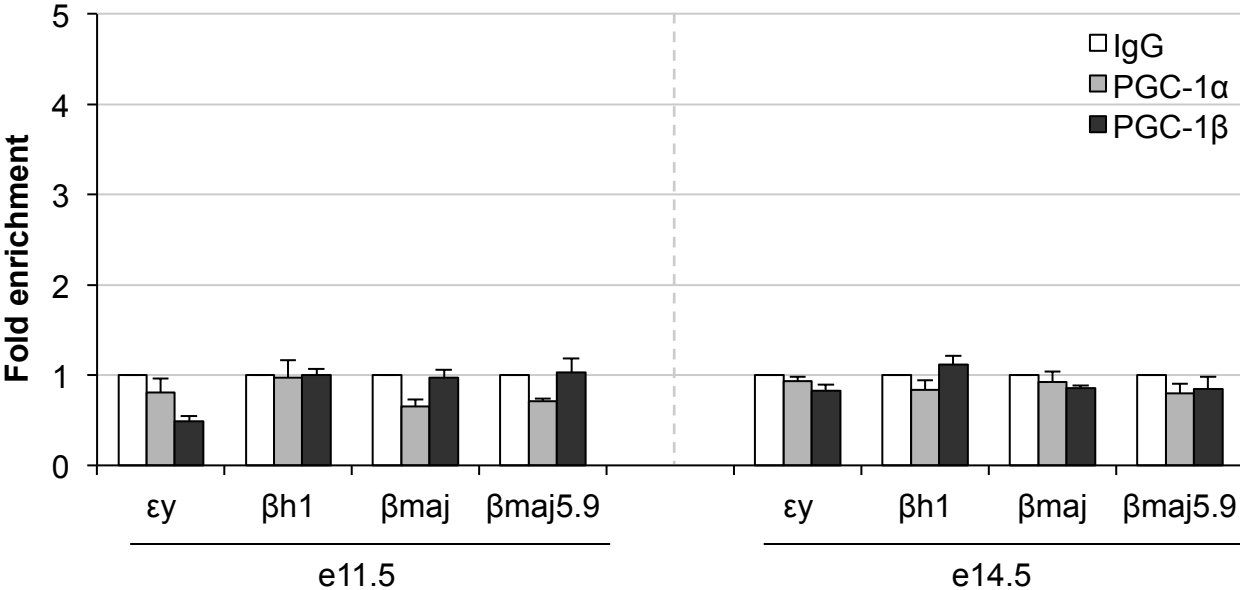

Supplement: MCB.00247-14_zmb999100428so6.pdf [file MCB.00247-14_zmb999100428so6.pdf]
